# Supplementary material for: Sensitive colorimetric detection of protein by gold nanoparticles and rolling circle amplification
Source: Royal Society of Chemistry journal article supplement (doi:10.1039/c5an00485c), 2015-01-01
Supplement: c5an00485c1.pdf [file c5an00485c1.pdf]

## Sensitive Colorimetric Detection of Protein by Gold Nanoparticles and Rolling Circle Amplification

Chaohui Chen, Ming Luo, Tai Ye, Ningxing Li, Xinghu Ji and Zhike He\*

*Key Laboratory of Analytical Chemistry for Biology and Medicine (Ministry of Education), College of Chemistry and Molecular Sciences, Wuhan University, Wuhan 430072, P. R. China*

\* Corresponding author. Tel: +86 27-68756557; fax: +86-27-68754067.

*E-mail addresses: zhkhe@whu.edu.cn (Z. He)*

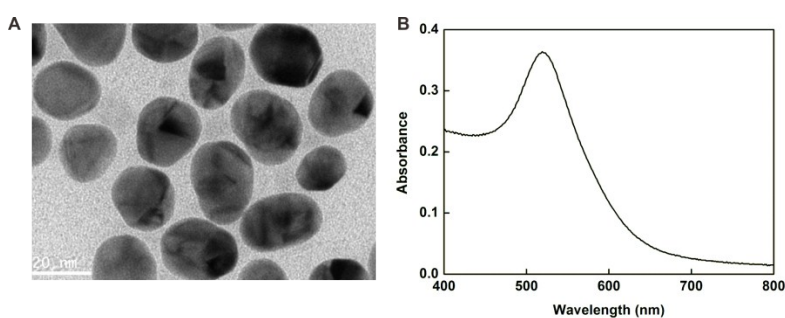

**Figure S1.** (A) TEM image of the 13 nm Au NPs. Scale bar: 20 nm. (B) UV-vis absorption spectroscopy of the 13 nm Au NPs at 520 nm.

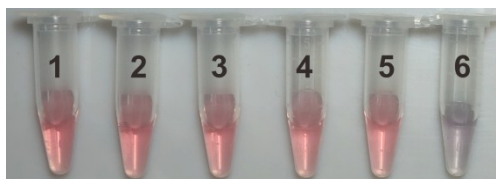

**Figure S2.** Color responses of AuNPs under different conditions: (1) in the absence of AFP; (2) in the absence of biotinylated antibody; (3) in the absence of SA; (4) in the absence of biotinylated DNA template; (5) without adding salts; (6) with all components.

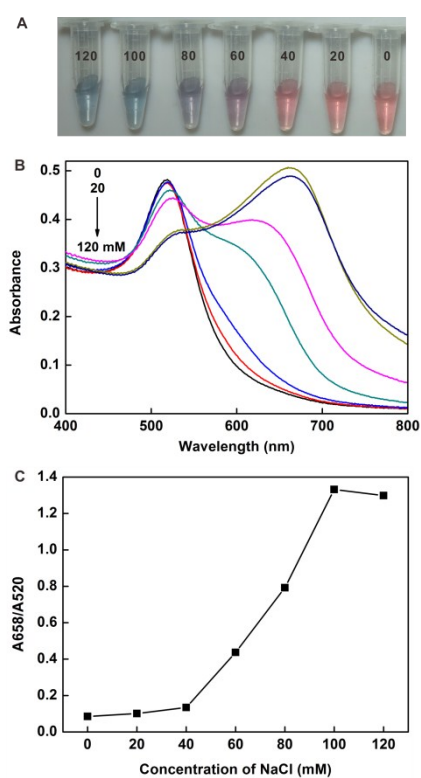

**Figure S3.** The effect of increasing salt concentration on the single-stranded padlock DNA coated gold nanoparticles.

### Preprocess of the RCA products on the immobilized template

After the amplification reaction, the microplate has been washed three times. Then, the padlock DNA (23.8 nM) in 5 mM Tris-HCl buffer (40 mM NaCl, pH = 8.00) was added into the well and incubated for 30 min. After that, the microplate has been heated to 95 °C for 15 min to make the protein denatured and remove the product of RCA from the immobilized template.

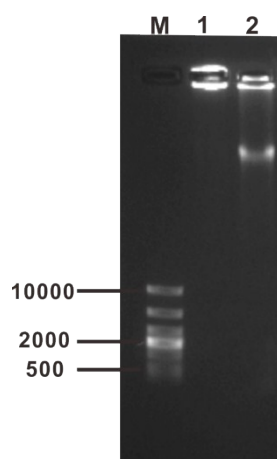

**Figure S4.** Gel electrophoresis of RCA products: lane M, the DNA ladder marker; lane 1: the products of homogeneous RCA; lane 2: the products of RCA on immobilized template.

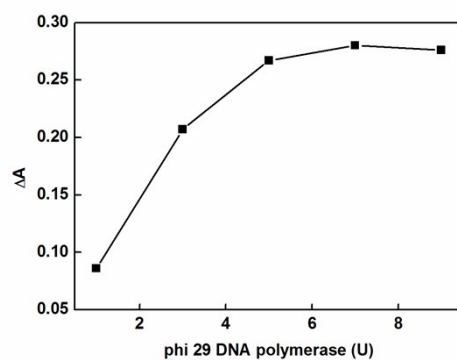

**Figure S5.** The effect of the amount of phi 29 DNA polymerase on the relative absorption intensity of the sensing system.

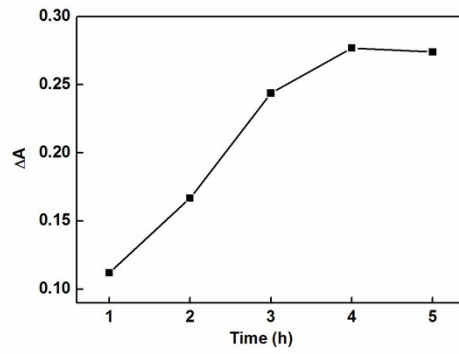

**Figure S6.** The effect of the incubation time of the RCA reaction on the relative absorption intensity of the sensing system.

**Table S1.** Analytical results for the determination of AFP in 10-fold diluted human serum with this amplification strategy.

| Sample number | Added (pg/mL) | Found (pg/mL) | Recovery (%) | RSD (%) |
|---------------|---------------|---------------|--------------|---------|
| 1             | 50            | 47.4          | 94.7         | 5.3     |
| 2             | 100           | 103.8         | 103.8        | 6.4     |
| 3             | 250           | 240.7         | 96.3         | 8.7     |
| 4             | 750           | 719.2         | 95.9         | 7.5     |
| 5             | 1000          | 989.1         | 98.9         | 11.3    |
